# Supplementary material for: Characterization of a Novel Acyl-ACP Δ9 Desaturase Gene Responsible for Palmitoleic Acid Accumulation in a Diatom Phaeodactylum tricornutum
Source: PubMed Central journal article supplement (PMC7772203; doi:10.3389/fmicb.2020.584589), 2020-12-16
Supplement: Data_Sheet_1.pdf [file Data_Sheet_1.pdf]

## Supplementary Material

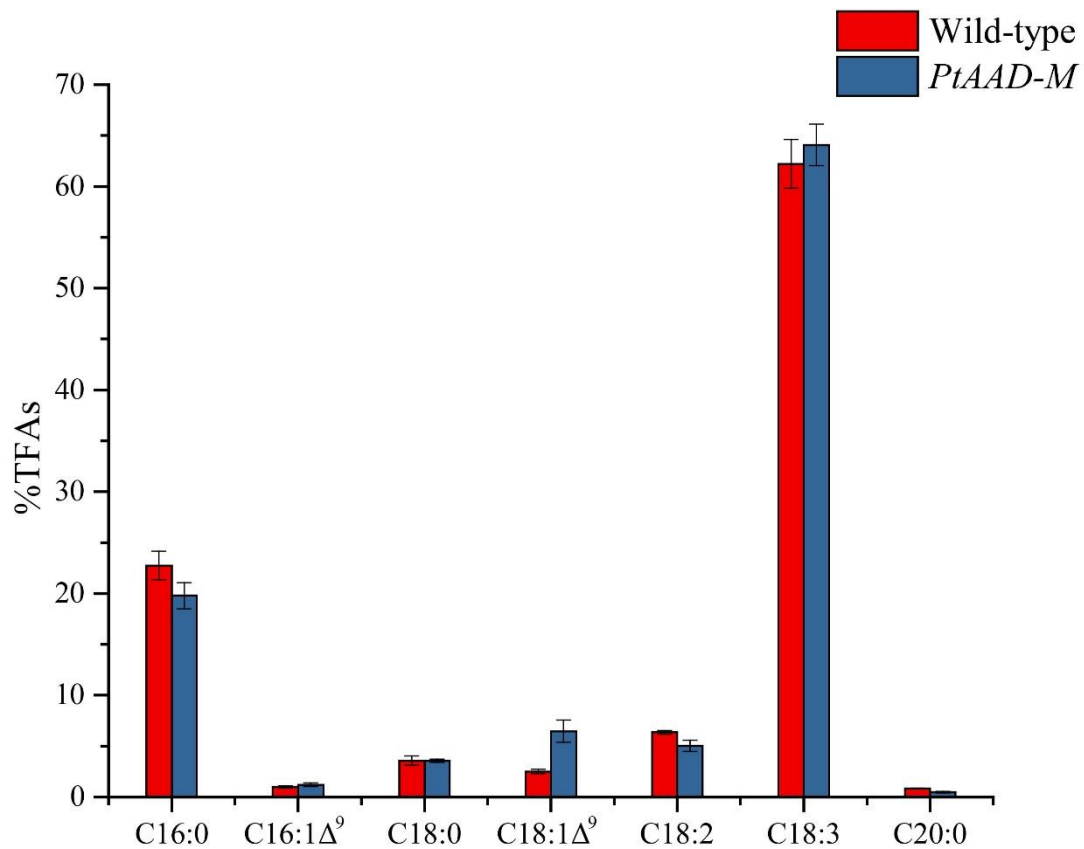

**Supplementary FIGURE S1** | Fatty acid composition in *N. benthamiana* leaves transiently expressing *PtAAD-M* gene. Fatty acids were analyzed by GC and the data are means of Mol%  $\pm$  SE with three independent replicates. Data are showed as mean  $\pm$  SE (n = 3).

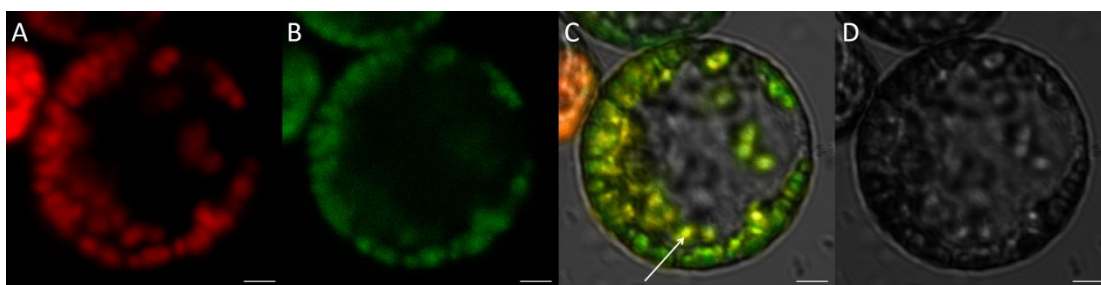

**Supplementary FIGURE S2** | Subcellular localization of PtAAD:GFP fusion protein in tobacco protoplasts. A laser scanning confocal microscope (DeltaVision Olympus) was used to obtain these images. (A) Red spontaneous fluorescence of chloroplast; (B) Green fluorescence of PtAAD:GFP fusion protein; (C) Yellow overlapping fluorescence of PtAAD:GFP fusion protein and chloroplast; (D) Protoplast cells under visible light. Bar=50  $\mu$ m.

**Supplementary TABLE 1** | Primers used in this study

| Name          | Sequence (5'→3')                                        | Purpose              |
|---------------|---------------------------------------------------------|----------------------|
| Ptactin-F     | AGGCAAAGCGTGGTGTCTTA                                    | Internal reference   |
| Ptactin-R     | TCTGGGGAGCCTCAGTCAATA                                   |                      |
| PtAAD-1F      | TGATGCGTGGACAGATTG                                      | qPCR analysis        |
| PtAAD-1R      | AGGTACTCCCGTTCCTTTT                                     |                      |
| PtAAD-2F      | TTCTCCGCTTCACAACCTC                                     | Detection analysis   |
| PtAAD-2R      | ACAATCTGTCCACGCATC                                      |                      |
| p1303-PtAAD-F | <b><i>Pst</i>I</b><br>CGGAATTCATGTTGTCTACGAACTTTTCTGG   | Cloning for pCAM1303 |
| p1303-PtAAD-R | <b><i>Kpn</i>I</b><br>CGGAATTCCTCAAGCCATCCGACCATAAATCCA |                      |
| pYES2-PtAAD-F | <b><i>Eco</i>RI</b><br>CGGAATTCATGTTGTCTACGAACTTTTCTGG  | Cloning for pYES2    |
| pYES2-PtAAD-R | <b><i>Xba</i>I</b><br>GCTCTAGATCAAGCCATCCGACCATAAATCCA  |                      |

**Supplementary TABLE 2** | Fatty acids composition in *P. tricornutum* cultured in N+ and 1/2N medium

| Main fatty acids ( % TFAs ) | Cultured Days  |                |            |                |            |
|-----------------------------|----------------|----------------|------------|----------------|------------|
|                             | 0              |                | 5          |                | 10         |
|                             | N <sup>+</sup> | N <sup>+</sup> | 1/2 N      | N <sup>+</sup> | 1/2 N      |
| 14:00                       | 6.33±0.33      | 6.01±0.21      | 4.96±0.25  | 6.18±0.34      | 4.34±0.17  |
| 16:00                       | 17.82±1.43     | 14.27±1.12     | 27.75±1.70 | 15.12±1.13     | 31.43±1.44 |
| 18:00                       | 4.71±0.12      | 1.17±0.07      | 1.38±0.08  | 1.85±0.07      | 1.42±0.06  |
| 20:00                       | 0.35±0.03      | 0.16±0.02      | 0.12±0.01  | 0.13±0.01      | 0.11±0.01  |
| 22:00                       | 0.31±0.02      | 0.21±0.02      | 0.19±0.01  | 0.18±0.01      | 0.2±0.02   |
| 16:1Δ <sup>9</sup>          | 25.83±1.05     | 32.74±1.27     | 40.25±2.15 | 33.56±1.37     | 44.61±2.42 |
| 18:1Δ <sup>9</sup>          | 2.98±0.10      | 2.77±0.12      | 3.18±0.11  | 2.93±0.08      | 3.57±0.14  |
| 18:1Δ <sup>11</sup>         | 1.76±0.02      | 0.89±0.04      | 2.02±0.08  | 0.62±0.03      | 2.99±0.11  |
| 20:01                       | 0.65±0.03      | 0.25±0.02      | 0.12±0.01  | 0.11±0.01      | 0.13±0.01  |
| 16:2 n-4                    | 2.18±0.14      | 2.35±0.09      | 0.56±0.03  | 2.67±0.11      | 0.43±0.02  |
| 16:3 n-4                    | 4.7±0.12       | 6.76±0.1       | 1.31±0.07  | 5.18±0.16      | 1.12±0.06  |
| 18:2 n-6                    | 2.66±0.1       | 1.84±0.06      | 1.42±0.07  | 2.28±0.11      | 0.72±0.05  |
| 18:3n-6                     | 1.24±0.1       | 0.51±0.03      | 0.92±0.08  | 0.39±0.03      | 0.75±0.04  |
| 18:3n-3                     | 3.1±0.11       | 1.08±0.08      | 0.54±0.02  | 1.57±0.09      | 0.33±0.03  |
| C20:5n-3(EPA)               | 20.78±0.75     | 24.3±0.97      | 11.05±0.31 | 23.27±1.3      | 5.28±0.42  |
| C22:6n-3(DHA)               | 2.1±0.06       | 1.79±0.12      | 1.73±0.05  | 1.85±0.1       | 0.51±0.03  |
| Others                      | 2.62±0.47      | 2.9±0.45       | 2.4±0.32   | 2.11±0.37      | 2.06±0.42  |
| SFAs                        | 28.52          | 21.82          | 34.4       | 23.46          | 37.5       |
| MUFAs                       | 30.32          | 36.65          | 45.67      | 37.22          | 51.3       |
| PUFAs                       | 36.54          | 38.63          | 17.53      | 37.21          | 9.14       |
| ω-7 FAs                     | 26.69          | 33.63          | 42.27      | 34.18          | 47.6       |

Note: %TFAs means % of total fatty acids. Data are counted and calculated as means ± SE of three biological repetitions.

Supplementary TABLE S3 | The nucleotide sequence of PtAAD and Phat3\_J9316

|             |                                                                                                                                                                                                                                                                                                                                                                                                                                                                                                                                                                                                                                                                                                                                                                                                                                                                                                                                                                                                                                                                                                                                     |
|-------------|-------------------------------------------------------------------------------------------------------------------------------------------------------------------------------------------------------------------------------------------------------------------------------------------------------------------------------------------------------------------------------------------------------------------------------------------------------------------------------------------------------------------------------------------------------------------------------------------------------------------------------------------------------------------------------------------------------------------------------------------------------------------------------------------------------------------------------------------------------------------------------------------------------------------------------------------------------------------------------------------------------------------------------------------------------------------------------------------------------------------------------------|
| Phat3_J9316 | <p>&gt;Phat3_J9316</p> <p>GAAAATGCTTGGCAGCCGCAAGATTACCTTCCCGATCTCT<br/> CGCAGGACAATTGGCATGACTCCATCAAGGAAGTCCGTG<br/> CCATGGCCAAGGAAATTCCGGACGAACTCTTGGTCGTGT<br/> TGATTGGCGATATGGTGACGGAAGAAGCTCTCCCAACCT<br/> ACCAGACGCTCTTGAATACCTTTGAAGGTTGCGATGACCC<br/> CACCGGCACTAGTGAATCTCCCTGGGCACGCTGGTCCCG<br/> CGGTTGGACTTCGGAAGAAAACCGGCACGGCGATTGCT<br/> CAACAAATATCTCTATCTGGGCGGCCGTTGCGACATGCG<br/> CAACATCGAGGTCACCATCCAGCACTTGATTACGAACGG<br/> ATTCAACCCGCAAGCCCGCAAAGACCCCTACCGCGGATT<br/> CGTGTATACGTCCTTTCAGGAACGTGCGACCAAATCTCG<br/> CACGGCAACGTGGGCAAGCTGGCCCGCACGTACGGCGAA<br/> AAGAATCTGAACAAGATTTGTGCAAAGATCGCGGGCGAC<br/> GAAGGTCGCCACGAGAAGGCTTATCAAATCTTTTCCGAA<br/> GAAATCTTAAAGCGTGATCCGGACGGACTCATTACGTTT<br/> TTGGTGACATGATGCGTGGACAGATTGTCATGCCTGCGG<br/> AACAGATGACGGATGGCAAAGATCCGGATTTGTACGATA<br/> ACTTTTCCATGGTTGCCCAGAAGACGGGTGTGTATACAGC<br/> CCTCGATTACGCAGAAATCATCGACCATCTGGTGAAACG<br/> GTGGGATTTGGAGCACCTGGAAGGTCTGTCACCGGCTGC<br/> CGAAAAGGAACGGGAGTACCTGTGCCGATTGCCGGAACG<br/> CTATCGCAAATTGGCGACCCGATCGATGAACAAAAGAA<br/> GAAAGTTACCGAAGACGAGGATCCACTCAAATCCTTTGG<br/> CTGGATTTATGGTCGGATGGCTTGA</p> |
| PtAAD       | <p>&gt;PtAAD</p> <p>ATGTTGTCTACGAACTTTTCTGGACGAGTTCGGTTTTGG<br/> CTTCCAGTGCGGTGCTTGCTTTCCACGTCGCCTGCGAC<br/> TAGGACTCCTCGCAGCACTTCCATTCTGAAGGTTGCCGTG<br/> GACCCCAACAGTGACCAAGAAGGAATACGAAGACAT<br/> CTGCGGGGTTTCGTTTCGACGCCGACACGTTGGAAGATCG<br/> TCTAAAGGCAACGAACTACTTGTATCCCAAACACGTCGA<br/> AGTCATCGATGACATTGCTCCTATTGCCGGAGCCATGGTG<br/> GATGAAATTCTTTGGAACTGGTGAAAATGCTTGGCAG<br/> CCGCAAGATTACCTTCCCGATCTCTCGCAGGACAATTGGC<br/> ATGACTCCATCAAGGAAGTCCGTGCCATGGCCAAGGAAA<br/> TTCCGGACGAACTCTTGGTCGTGTTGATTGGCGATATGGT<br/> GACGGAAGAAGCTCTCCAACCTACCAGACGCTCTTGAA<br/> TACCTTTGAAGGTTGCGATGACCCACCGGCACTAGTGA<br/> ATCTCCCTGGGCACGCTGGTCCCGCGGTTGGACTTCGGAA<br/> GAAAACCGGCACGGCGATTGCTCAACAAATATCTCTAT</p>                                                                                                                                                                                                                                                                                                                                                                                                                  |

CTGGGCGGCCGTTGCGACATGCGCAACATCGAGGTCACC  
ATCCAGCACTTGATTACGAACGGATTCAACCCGCAAGCC  
CGAAAGACCCCTACCGCGGATTCGTGTATACGTCCTTTC  
AGGAACGTGCGACCAAATCTCGCACGGCAACGTGGGCA  
AGCTGGCCCGCACGTACGGCGAAAAGAATCTGAACAAGA  
TTTGTGCAAAGATCGCGGGCGACGAAGGTCGCCACGAGA  
AGGCTTATCAAATCTTTTCCGAAGAAATCTTAAAGCGTGA  
TCCGGACGGACTCATTACGTTTTTGGTGACATGATGCGT  
GGACAGATTGTCATGCCTGCGGAACAGATGACGGATGGC  
AAAGATCCGGATTTGTACGATAACTTTTCCATGGTTGCC  
AGAAGACGGGTGTGTATACAGCCCTCGATTACGCAGAAA  
TCATCGACCATCTGGTGAAACGGTGGGATTTGGAGCACC  
TGGAAGGTCTGTCACCGGCTGCCGAAAAGGAACGGGAGT  
ACCTGTGCCGATTGCCGGAACGCTATCGCAAATTGGCGA  
CCCGATCGATGAACAAAAAGAAGAAAGTTACCGAAGAC  
GAGGATCCACTCAAATCCTTTGGCTGGATTTATGGTCGGA  
TGGCTTGA
